# Supplementary material for: Association of Grandparental and Parental Age at Childbirth With Autism Spectrum Disorder in Children
Source: PubMed Central journal article supplement (PMC7160691; doi:10.1001/jamanetworkopen.2020.2868), 2020-04-15
Supplement: jamanetwopen-3-e202868-s001.pdf [file jamanetwopen-3-e202868-s001.pdf]

## Supplementary Online Content

Gao Y, Yu Y, Xiao J, et al. Association of grandparental and parental age at childbirth with autism spectrum disorder in children. *JAMA Netw Open*. 2020;3(4):e202868. doi:10.1001/jamanetworkopen.2020.2868

**eTable 1.** Odds Ratios and 95% Confidence Intervals for Diagnosis of ASD in Children According to Continuous Parental Age (per 5-Year Increase) at Delivery

**eTable 2.** Odds Ratios and 95% Confidence Intervals for Diagnosis of ASD in Children According to Parental Age (Years) at Delivery (Restricted to Children Born 2000-2013)

**eTable 3.** Odds Ratios and 95% Confidence Intervals for Diagnosis of ASD in Children According to Paternal Age (Years) at Delivery, Further Adjustment of Paternal Education

**eTable 4.** Effect Estimate for Diagnosis of ASD in Children According to Continuous Grandparental Age (per 5-Year Increase) at Delivery

**eTable 5.** Odds Ratios and 95% Confidence Intervals for Diagnosis of ASD in Children According to Parental and Grandparental Age (years) at Delivery (Stratified by ASD Types)

**eTable 6.** Odds Ratios and 95% Confidence Intervals for Diagnosis of ASD in Children According to Parental and Grandparental Age (years) at Delivery (Stratified by Child's Sex)

**eTable 7.** Odds Ratios and 95% Confidence Intervals for Diagnosis of ASD in Children According to Parental and Grandparental Age (Years) at Delivery (Stratified By Maternal or Grandmaternal Parity)

**eTable 8.** Odds Ratios and 95% Confidence Intervals for Diagnosis of ASD in Grandchildren According to Grandparental Age (Years) at Delivery (Extent Multigenerational Cohort to Parents Born 1942-1990 Relinked From CRS)

**eFigure 1.** The Directed Acyclic Graph (DAG) for the Main Variables Included in the Analyses for Parental Age and ASD Risk in Children

**eFigure 2.** The Directed Acyclic Graph (DAG) for the Main Variables Included in the Analyses for Grandparental Age and ASD Risk in Grandchildren

**eFigure 3.** Mean Age at Birth of the Parents and Grandparents in Parental Age Cohort and Multigenerational Cohort During the Study Period

This supplementary material has been provided by the authors to give readers additional information about their work.

**eTable 1.** Odds Ratios and 95% Confidence Intervals for Diagnosis of ASD in Children According to Continuous Parental Age (per 5-Year Increase) at Delivery

|                           | Model 1 |           | Model 2 |           |
|---------------------------|---------|-----------|---------|-----------|
|                           | OR      | 95% CI    | OR      | 95% CI    |
| Maternal age <sup>a</sup> | 1.09    | 1.07-1.10 | 1.03    | 1.02-1.05 |
| Paternal age <sup>a</sup> | 1.09    | 1.08-1.10 | 1.07    | 1.06-1.09 |

OR: Odds ratios 95% CI: 95% Confidence Intervals

Continuous age variable was re-centered to age 25 and rescaled for per 5-year increase.

Model 1: Adjust for child birth year, maternal parity, maternal education, maternal country of origin.

Model 2: Adjust for child birth year, maternal parity, maternal education, maternal country of origin, spouse age.

**eTable 2.** Odds Ratios and 95% Confidence Intervals for Diagnosis of ASD in Children According to Parental Age (Years) at Delivery (Restricted to Children Born 2010-2013)

| Maternal age, years | ASD        |                | Model 1   |           | Model 2   |           | Model 3   |           |
|---------------------|------------|----------------|-----------|-----------|-----------|-----------|-----------|-----------|
|                     | N of cases | N of non-cases | OR        | 95% CI    | OR        | 95% CI    | OR        | 95% CI    |
| ≤19                 | 202        | 8688           | 0.92      | 0.80-1.07 | 0.91      | 0.77-1.07 | 0.88      | 0.76-1.02 |
| 20-24               | 1728       | 82187          | 0.99      | 0.93-1.05 | 0.99      | 0.93-1.05 | 0.96      | 0.90-1.02 |
| 25-29               | 4710       | 257672         | reference |           | reference |           | reference |           |
| 30-34               | 5181       | 308896         | 1.06      | 1.02-1.11 | 1.04      | 0.99-1.09 | 1.08      | 1.04-1.13 |
| 35-39               | 2402       | 143440         | 1.17      | 1.11-1.23 | 1.09      | 1.03-1.15 | 1.21      | 1.15-1.27 |
| ≥40                 | 586        | 26982          | 1.59      | 1.46-1.74 | 1.40      | 1.27-1.54 | 1.66      | 1.52-1.82 |
| Paternal age, years |            |                |           |           |           |           |           |           |
| ≤19                 | 60         | 2427           | 0.99      | 0.76-1.29 | 1.05      | 0.79-1.38 | 0.96      | 0.74-1.25 |
| 20-24               | 857        | 39287          | 1.02      | 0.95-1.11 | 1.03      | 0.95-1.13 | 1.00      | 0.92-1.08 |
| 25-29               | 3363       | 178463         | reference |           | reference |           | reference |           |
| 30-34               | 5190       | 303245         | 1.04      | 0.99-1.08 | 1.02      | 0.97-1.07 | 1.05      | 1.00-1.10 |
| 35-39               | 3383       | 201894         | 1.11      | 1.06-1.17 | 1.07      | 1.01-1.13 | 1.14      | 1.08-1.20 |
| 40-44               | 1393       | 74378          | 1.31      | 1.23-1.40 | 1.21      | 1.13-1.30 | 1.36      | 1.27-1.45 |
| 45-49               | 395        | 20911          | 1.36      | 1.22-1.51 | 1.21      | 1.08-1.36 | 1.40      | 1.26-1.56 |
| ≥50                 | 168        | 7260           | 1.64      | 1.40-1.92 | 1.46      | 1.24-1.71 | 1.69      | 1.46-1.98 |

Restricted children born 2000-2013

OR: Odds ratios 95% CI: 95% Confidence Intervals

Model 1: Adjust for child birth year, maternal parity, maternal education, maternal country of origin

Model 2: Adjust for child birth year, maternal parity, maternal education, maternal country of origin, spouse age

Model 3: Adjust for child birth year, maternal parity, maternal education, maternal country of origin, family psychiatric history

**Table 3.** Odds Ratios and 95% Confidence Intervals for Diagnosis of ASD in Children According to Paternal Age (Years) at Delivery, Further Adjustment of Paternal Education

|              | ASD         |                 | Model 1   |           | Model 2   |           |
|--------------|-------------|-----------------|-----------|-----------|-----------|-----------|
|              | No of cases | No of Non-cases | OR        | 95% CI    | OR        | 95% CI    |
| Paternal age |             |                 |           |           |           |           |
| ≤19          | 120         | 5093            | 0.92      | 0.76-1.12 | 0.97      | 0.79-1.19 |
| 20-24        | 1886        | 85626           | 1.00      | 0.95-1.05 | 1.00      | 0.94-1.05 |
| 25-29        | 7028        | 362535          | reference |           | reference |           |
| 30-34        | 9464        | 526094          | 1.03      | 1.00-1.06 | 1.02      | 0.99-1.06 |
| 35-39        | 5838        | 316467          | 1.15      | 1.10-1.19 | 1.11      | 1.07-1.16 |
| 40-44        | 2322        | 111036          | 1.36      | 1.29-1.43 | 1.27      | 1.20-1.34 |
| 45-49        | 693         | 31262           | 1.45      | 1.34-1.58 | 1.33      | 1.22-1.45 |
| ≥50          | 265         | 11054           | 1.53      | 1.35-1.74 | 1.40      | 1.23-1.60 |

Model 1: Adjust for child birth year, maternal parity, , maternal education, maternal country of origin.

Model 2: Adjust for child birth year, maternal parity, maternal education, maternal country of origin, paternal education.

Information of paternal education was obtained from the Integrated Database for Labour Market Research. About 5% (1381cases and 72458 non-cases) without paternal education information were excluded in Model 2.

**eTable 4.** Odds Ratios and 95% Confidence Intervals for Diagnosis of ASD in Children According to Continuous Grandparental Age (per 5-Year Increase) at Delivery

| Model 1                               | intercept | Linear age term |      | Squared age term |       |                |
|---------------------------------------|-----------|-----------------|------|------------------|-------|----------------|
|                                       |           | $\beta$         | SE   | $\beta$          | SE    | <i>P</i> value |
| Maternal grandmother age <sup>a</sup> | -3.98     | -0.87           | 0.11 | 0.066            | 0.010 | <0.01          |
| Maternal grandfather age <sup>a</sup> | -3.92     | -0.43           | 0.08 | 0.029            | 0.006 | <0.01          |
| Paternal grandmother age <sup>b</sup> | -4.17     | -0.39           | 0.13 | 0.032            | 0.012 | 0.008          |
| Paternal grandfather age <sup>b</sup> | -4.15     | -0.30           | 0.09 | 0.023            | 0.007 | 0.001          |
| Model 2                               |           |                 |      |                  |       |                |
| Maternal grandmother age <sup>c</sup> | -3.97     | -0.79           | 0.12 | 0.061            | 0.011 | <0.001         |
| Maternal grandfather age <sup>c</sup> | -3.97     | -0.10           | 0.09 | 0.007            | 0.007 | 0.308          |
| Paternal grandmother age <sup>d</sup> | -4.19     | -0.24           | 0.16 | 0.018            | 0.014 | 0.198          |
| Paternal grandfather age <sup>d</sup> | -4.19     | -0.35           | 0.20 | 0.031            | 0.016 | 0.056          |

OR: Odds ratios 95% CI: 95% Confidence Intervals

Continuous age variable was re-centered to age 25 and rescaled for per 5-year increase. A linear term and a squared term of age were included in the logistic regression models.

Model 1: a: Adjust for maternal birth year, maternal grandmaternal parity, maternal grandmother education.

b: Adjust for paternal birth year, paternal grandmaternal parity, paternal grandmother education.

Model 2: c: Adjust for maternal birth year, maternal grandmaternal parity, maternal grandmother education, maternal grand spouse age

d: Adjust for paternal birth year, paternal grandmaternal parity, paternal grandmother education, paternal grand spouse age

**eTable 5.** Odds Ratios and 95% Confidence Intervals for Diagnosis of ASD in Children According to Parental and Grandparental Age (Years) at Delivery (Stratified by ASD Types)

| Maternal age, years <sup>a</sup>      | Childhood autism (F84.0) |                |           |           | Asperger's syndrome (F84.5) |                |           |           | Other types |                |           |           |
|---------------------------------------|--------------------------|----------------|-----------|-----------|-----------------------------|----------------|-----------|-----------|-------------|----------------|-----------|-----------|
|                                       | N of cases               | N of non-cases | OR        | 95% CI    | N of cases                  | N of non-cases | OR        | 95% CI    | N of cases  | N of non-cases | OR        | 95% CI    |
| ≤19                                   | 129                      | 19005          | 0.84      | 0.70-1.01 | 84                          | 19005          | 0.75      | 0.60-0.94 | 258         | 19005          | 1.06      | 0.93-1.21 |
| 20-24                                 | 1152                     | 176842         | 0.97      | 0.90-1.04 | 1025                        | 176842         | 1.02      | 0.94-1.10 | 2266        | 176842         | 1.12      | 1.06-1.18 |
| 25-29                                 | 2769                     | 498454         | reference |           | 2731                        | 498454         | reference |           | 5100        | 498454         | reference |           |
| 30-34                                 | 2803                     | 507045         | 1.08      | 1.02-1.14 | 2572                        | 507045         | 1.12      | 1.06-1.18 | 5111        | 507045         | 1.08      | 1.03-1.12 |
| 35-39                                 | 1352                     | 211177         | 1.30      | 1.21-1.39 | 1054                        | 211177         | 1.31      | 1.22-1.41 | 2166        | 211177         | 1.17      | 1.11-1.24 |
| ≥40                                   | 293                      | 36644          | 1.61      | 1.42-1.82 | 206                         | 36644          | 1.70      | 1.47-1.97 | 475         | 36644          | 1.54      | 1.40-1.70 |
| Paternal age, years <sup>a</sup>      |                          |                |           |           |                             |                |           |           |             |                |           |           |
| ≤19                                   | 32                       | 5093           | 0.79      | 0.56-1.12 | 24                          | 5093           | 0.77      | 0.52-1.16 | 78          | 5093           | 1.10      | 0.87-1.38 |
| 20-24                                 | 529                      | 85626          | 0.93      | 0.84-1.02 | 525                         | 85626          | 1.06      | 0.96-1.17 | 1063        | 85626          | 1.02      | 0.96-1.10 |
| 25-29                                 | 2044                     | 362535         | reference |           | 2051                        | 362535         | reference |           | 3952        | 362535         | reference |           |
| 30-34                                 | 2844                     | 526094         | 1.03      | 0.97-1.10 | 2711                        | 526094         | 1.06      | 1.00-1.12 | 5216        | 526094         | 0.99      | 0.95-1.03 |
| 35-39                                 | 1857                     | 316467         | 1.17      | 1.09-1.25 | 1540                        | 316467         | 1.17      | 1.09-1.25 | 3282        | 316467         | 1.11      | 1.06-1.17 |
| 40-44                                 | 844                      | 111036         | 1.50      | 1.38-1.63 | 575                         | 111036         | 1.37      | 1.25-1.51 | 1266        | 111036         | 1.27      | 1.19-1.35 |
| 45-49                                 | 235                      | 31262          | 1.47      | 1.28-1.69 | 179                         | 31262          | 1.57      | 1.34-1.83 | 386         | 31262          | 1.41      | 1.26-1.56 |
| ≥50                                   | 113                      | 11054          | 1.92      | 1.59-2.33 | 67                          | 11054          | 1.69      | 1.32-2.16 | 133         | 11054          | 1.37      | 1.15-1.64 |
| Maternal grandmother age <sup>b</sup> |                          |                |           |           |                             |                |           |           |             |                |           |           |
| ≤19                                   | 234                      | 23418          | 1.90      | 1.62-2.23 | 118                         | 23418          | 1.85      | 1.48-2.32 | 338         | 23418          | 1.53      | 1.34-1.74 |
| 20-24                                 | 1044                     | 157907         | 1.26      | 1.15-1.39 | 564                         | 157907         | 1.34      | 1.17-1.53 | 1785        | 157907         | 1.23      | 1.15-1.33 |
| 25-29                                 | 942                      | 176418         | reference |           | 496                         | 176418         | reference |           | 1620        | 176418         | reference |           |
| 30-34                                 | 454                      | 72521          | 1.13      | 1.00-1.27 | 204                         | 72521          | 0.95      | 0.80-1.13 | 680         | 72521          | 0.99      | 0.90-1.09 |
| ≥35                                   | 134                      | 20233          | 1.15      | 0.95-1.39 | 56                          | 20233          | 0.90      | 0.68-1.19 | 197         | 20233          | 0.99      | 0.85-1.16 |
| Maternal grandfather age <sup>b</sup> |                          |                |           |           |                             |                |           |           |             |                |           |           |
| ≤19                                   | 52                       | 5578           | 1.59      | 1.19-2.11 | 35                          | 5578           | 2.01      | 1.42-2.85 | 79          | 5578           | 1.39      | 1.10-1.75 |
| 20-24                                 | 646                      | 88583          | 1.26      | 1.14-1.40 | 325                         | 88583          | 1.17      | 1.02-1.35 | 1097        | 88583          | 1.24      | 1.14-1.34 |
| 25-29                                 | 1059                     | 186817         | reference |           | 580                         | 186817         | reference |           | 1841        | 186817         | reference |           |

|                                       |     |        |           |           |     |        |           |           |      |        |           |           |
|---------------------------------------|-----|--------|-----------|-----------|-----|--------|-----------|-----------|------|--------|-----------|-----------|
| 30-34                                 | 662 | 114277 | 1.02      | 0.92-1.13 | 344 | 114277 | 0.98      | 0.85-1.13 | 1061 | 114277 | 0.94      | 0.86-1.01 |
| 35-39                                 | 282 | 38889  | 1.25      | 1.08-1.43 | 113 | 38889  | 0.92      | 0.75-1.14 | 368  | 38889  | 0.93      | 0.82-1.04 |
| ≥40                                   | 107 | 16353  | 1.10      | 0.89-1.35 | 41  | 16353  | 0.74      | 0.53-1.02 | 176  | 16353  | 1.01      | 0.86-1.19 |
| Paternal grandmother age <sup>c</sup> |     |        |           |           |     |        |           |           |      |        |           |           |
| ≤19                                   | 131 | 17246  | 1.23      | 1.00-1.50 | 45  | 17246  | 1.09      | 0.77-1.52 | 191  | 17246  | 1.16      | 0.98-1.36 |
| 20-24                                 | 757 | 121846 | 1.06      | 0.95-1.18 | 309 | 121846 | 1.06      | 0.90-1.25 | 1245 | 121846 | 1.12      | 1.03-1.22 |
| 25-29                                 | 800 | 142482 | reference |           | 349 | 142482 | reference |           | 1261 | 142482 | reference |           |
| 30-34                                 | 337 | 59116  | 1.03      | 0.90-1.17 | 143 | 59116  | 0.99      | 0.81-1.21 | 534  | 59116  | 1.01      | 0.91-1.12 |
| ≥35                                   | 97  | 16173  | 1.06      | 0.85-1.32 | 35  | 16173  | 0.87      | 0.61-1.25 | 163  | 16173  | 1.08      | 0.91-1.28 |
| Paternal grandfather age <sup>c</sup> |     |        |           |           |     |        |           |           |      |        |           |           |
| ≤24                                   | 481 | 72627  | 1.11      | 0.99-1.25 | 187 | 72627  | 1.07      | 0.89-1.29 | 764  | 72627  | 1.12      | 1.02-1.23 |
| 25-29                                 | 853 | 149105 | reference |           | 368 | 149105 | reference |           | 1358 | 149105 | reference |           |
| 30-34                                 | 521 | 91618  | 1.02      | 0.91-1.14 | 211 | 91618  | 0.95      | 0.80-1.13 | 858  | 91618  | 1.03      | 0.95-1.13 |
| 35-39                                 | 185 | 30769  | 1.07      | 0.91-1.27 | 77  | 30769  | 1.03      | 0.80-1.34 | 270  | 30769  | 0.95      | 0.83-1.09 |
| ≥40                                   | 82  | 12744  | 1.11      | 0.88-1.41 | 38  | 12744  | 1.17      | 0.83-1.65 | 144  | 12744  | 1.16      | 0.97-1.39 |

OR: Odds ratios 95% CI: 95% Confidence Intervals

a: Adjust for child birth year, maternal parity, maternal education, maternal country of origin

b: Adjust for maternal l birth year, maternal grandmaternal parity, maternal grandmother education

c: Adjust for paternal birth year, paternal granmaternal parity, paternal grandmother education

**eTable 6.** Odds Ratios and 95% Confidence Intervals for Diagnosis of ASD in Children According to Parental and Grandparental Age (Years) at Delivery (Stratified by Child's Sex)

| Maternal age <sup>a</sup>             | ASD of Male |                |           |           | ASD of Female |                |           |           |
|---------------------------------------|-------------|----------------|-----------|-----------|---------------|----------------|-----------|-----------|
|                                       | N of cases  | N of non-cases | OR        | 95% CI    | N of cases    | N of non-cases | OR        | 95% CI    |
| ≤19                                   | 334         | 9691           | 0.97      | 0.87-1.09 | 85            | 9312           | 0.76      | 0.61-0.95 |
| 20-24                                 | 2928        | 89833          | 1.05      | 1.00-1.10 | 965           | 86989          | 1.02      | 0.94-1.10 |
| 25-29                                 | 6922        | 253502         | reference |           | 2431          | 244897         | reference |           |
| 30-34                                 | 6725        | 258358         | 1.07      | 1.03-1.11 | 2430          | 248648         | 1.10      | 1.03-1.16 |
| 35-39                                 | 2948        | 107585         | 1.22      | 1.16-1.28 | 1012          | 103584         | 1.20      | 1.11-1.30 |
| ≥40                                   | 610         | 18630          | 1.53      | 1.40-1.66 | 226           | 18014          | 1.66      | 1.44-1.91 |
| Paternal age <sup>a</sup>             |             |                |           |           |               |                |           |           |
| ≤19                                   | 85          | 2564           | 0.90      | 0.72-1.12 | 35            | 2528           | 1.13      | 0.81-1.59 |
| 20-24                                 | 1429        | 43586          | 1.03      | 0.97-1.10 | 457           | 42030          | 0.98      | 0.89-1.09 |
| 25-29                                 | 5192        | 184514         | reference |           | 1836          | 177981         | reference |           |
| 30-34                                 | 6962        | 268017         | 1.02      | 0.99-1.06 | 2502          | 258038         | 1.02      | 0.96-1.10 |
| 35-39                                 | 4349        | 161027         | 1.16      | 1.11-1.21 | 1489          | 155414         | 1.11      | 1.03-1.19 |
| 40-44                                 | 1738        | 56540          | 1.37      | 1.29-1.45 | 584           | 54489          | 1.31      | 1.19-1.44 |
| 45-49                                 | 516         | 15796          | 1.47      | 1.34-1.61 | 177           | 15466          | 1.44      | 1.23-1.69 |
| ≥50                                   | 196         | 5555           | 1.58      | 1.37-1.83 | 69            | 5498           | 1.58      | 1.24-2.02 |
| Maternal grandmother age <sup>b</sup> |             |                |           |           |               |                |           |           |
| ≤19                                   | 473         | 11926          | 1.71      | 1.53-1.92 | 128           | 11490          | 1.54      | 1.25-1.90 |
| 20-24                                 | 2232        | 80240          | 1.24      | 1.16-1.32 | 725           | 77667          | 1.30      | 1.16-1.46 |
| 25-29                                 | 2031        | 89725          | reference |           | 650           | 86693          | reference |           |
| 30-34                                 | 904         | 37093          | 1.03      | 0.95-1.12 | 264           | 35428          | 0.95      | 0.82-1.11 |
| ≥35                                   | 258         | 10332          | 1.01      | 0.89-1.15 | 72            | 9901           | 0.90      | 0.70-1.16 |
| Maternal grandfather age <sup>b</sup> |             |                |           |           |               |                |           |           |
| ≤19                                   | 103         | 2822           | 1.43      | 1.16-1.75 | 38            | 2755           | 1.73      | 1.24-2.42 |
| 20-24                                 | 1377        | 45074          | 1.23      | 1.14-1.32 | 423           | 43508          | 1.21      | 1.07-1.37 |
| 25-29                                 | 2315        | 95266          | reference |           | 740           | 91551          | reference |           |
| 30-34                                 | 1387        | 57881          | 0.98      | 0.92-1.05 | 426           | 56396          | 0.93      | 0.82-1.05 |
| 35-39                                 | 489         | 19871          | 0.98      | 0.88-1.08 | 165           | 19018          | 1.05      | 0.87-1.25 |
| ≥40                                   | 227         | 8402           | 1.02      | 0.89-1.18 | 47            | 7951           | 0.68      | 0.50-0.92 |
| Paternal grandmother age <sup>c</sup> |             |                |           |           |               |                |           |           |
| ≤19                                   | 253         | 8959           | 1.19      | 1.03-1.39 | 75            | 8287           | 1.10      | 0.84-1.45 |
| 20-24                                 | 1555        | 62077          | 1.10      | 1.01-1.19 | 457           | 59769          | 1.06      | 0.90-1.23 |
| 25-29                                 | 1622        | 72627          | reference |           | 476           | 69855          | reference |           |
| 30-34                                 | 672         | 30139          | 0.94      | 0.85-1.05 | 217           | 28977          | 1.11      | 0.91-1.34 |
| ≥35                                   | 186         | 8200           | 1.10      | 0.93-1.30 | 62            | 7973           | 1.19      | 0.88-1.62 |
| Paternal grandfather age <sup>c</sup> |             |                |           |           |               |                |           |           |
| ≤24                                   | 971         | 36961          | 1.15      | 1.04-1.27 | 287           | 35666          | 1.13      | 0.95-1.36 |
| 25-29                                 | 1728        | 76054          | reference |           | 520           | 73051          | reference |           |
| 30-34                                 | 1064        | 46758          | 1.03      | 0.94-1.13 | 321           | 44860          | 0.99      | 0.83-1.18 |
| 35-39                                 | 353         | 15819          | 0.98      | 0.85-1.13 | 106           | 14950          | 0.96      | 0.73-1.25 |
| ≥40                                   | 172         | 6410           | 1.12      | 0.92-1.36 | 53            | 6334           | 1.27      | 0.90-1.80 |



OR: Odds ratios 95% CI: 95% Confidence Intervals

a: Adjust for child birth year, maternal parity, maternal education, maternal country of origin

b: Adjust for maternal 1 birth year, maternal grandmaternal parity, maternal grandmother education

c: Adjust for paternal birth year, paternal grandmaternal parity, paternal grandmother education

**eTable 7.** Odds Ratios and 95% Confidence Intervals for Diagnosis of ASD in Children According to Parental and Grandparental Age (Years) at Delivery (Stratified by Maternal or Grandmaternal Parity)

|                                             | First-born children or parents <sup>d</sup> |                |           |           | All children or parents <sup>e</sup> |                |           |           |
|---------------------------------------------|---------------------------------------------|----------------|-----------|-----------|--------------------------------------|----------------|-----------|-----------|
| Maternal age <sup>a</sup>                   | N of cases                                  | N of non-cases | OR        | 95% CI    | N of cases                           | N of non-cases | OR        | 95% CI    |
| ≤19                                         | 397                                         | 17416          | 0.95      | 0.86-1.06 | 419                                  | 19005          | 0.92      | 0.83-1.02 |
| 20-24                                       | 2922                                        | 126444         | 1.06      | 1.01-1.11 | 3893                                 | 176842         | 1.04      | 1.00-1.08 |
| 25-29                                       | 5436                                        | 271853         | reference |           | 9353                                 | 498454         | Reference |           |
| 30-34                                       | 3633                                        | 165469         | 1.14      | 1.09-1.19 | 9155                                 | 507045         | 1.08      | 1.04-1.11 |
| 35-39                                       | 1117                                        | 45628          | 1.30      | 1.22-1.39 | 3960                                 | 211177         | 1.22      | 1.17-1.27 |
| ≥40                                         | 202                                         | 7284           | 1.53      | 1.33-1.76 | 836                                  | 36644          | 1.56      | 1.45-1.68 |
| <b>Paternal age<sup>a</sup></b>             |                                             |                |           |           |                                      |                |           |           |
| ≤19                                         | 108                                         | 4688           | 0.94      | 0.77-1.14 | 120                                  | 5093           | 0.96      | 0.80-1.15 |
| 20-24                                       | 1463                                        | 65255          | 1.02      | 0.96-1.08 | 1886                                 | 85626          | 1.02      | 0.97-1.08 |
| 25-29                                       | 4480                                        | 220474         | reference |           | 7028                                 | 362535         | Reference |           |
| 30-34                                       | 4432                                        | 213659         | 1.06      | 1.01-1.10 | 9464                                 | 526094         | 1.02      | 0.99-1.06 |
| 35-39                                       | 2096                                        | 87916          | 1.25      | 1.19-1.32 | 5838                                 | 316467         | 1.14      | 1.10-1.19 |
| 40-44                                       | 770                                         | 29010          | 1.43      | 1.32-1.54 | 2322                                 | 111036         | 1.35      | 1.29-1.42 |
| 45-49                                       | 254                                         | 9272           | 1.52      | 1.33-1.73 | 693                                  | 31262          | 1.46      | 1.35-1.58 |
| ≥50                                         | 104                                         | 3820           | 1.52      | 1.25-1.86 | 265                                  | 11054          | 1.57      | 1.39-1.78 |
| <b>Maternal grandmother age<sup>b</sup></b> |                                             |                |           |           |                                      |                |           |           |
| ≤19                                         | 545                                         | 20889          | 1.74      | 1.54-1.96 | 601                                  | 23418          | 1.68      | 1.52-1.85 |
| 20-24                                       | 1731                                        | 99029          | 1.25      | 1.14-1.36 | 2957                                 | 157907         | 1.25      | 1.18-1.33 |
| 25-29                                       | 744                                         | 55690          | reference |           | 2681                                 | 176418         | reference |           |
| 30-34                                       | 135                                         | 9718           | 1.05      | 0.87-1.26 | 1168                                 | 72521          | 1.02      | 0.95-1.10 |
| ≥35                                         | 26                                          | 1917           | 0.98      | 0.66-1.46 | 330                                  | 20233          | 0.99      | 0.88-1.11 |
| <b>Maternal grandfather age<sup>b</sup></b> |                                             |                |           |           |                                      |                |           |           |
| ≤19                                         | 127                                         | 5070           | 1.46      | 1.21-1.75 | 141                                  | 5578           | 1.50      | 1.26-1.78 |
| 20-24                                       | 1252                                        | 64475          | 1.18      | 1.09-1.28 | 1800                                 | 88583          | 1.22      | 1.15-1.30 |
| 25-29                                       | 1296                                        | 83983          | reference |           | 3055                                 | 186817         | reference |           |
| 30-34                                       | 374                                         | 25576          | 0.98      | 0.87-1.10 | 1813                                 | 114277         | 0.96      | 0.91-1.02 |
| 35-39                                       | 102                                         | 5595           | 1.21      | 0.99-1.48 | 654                                  | 38889          | 0.99      | 0.91-1.09 |
| ≥40                                         | 30                                          | 2544           | 0.76      | 0.53-1.10 | 274                                  | 16353          | 0.94      | 0.83-1.07 |
| <b>Paternal grandmother age<sup>c</sup></b> |                                             |                |           |           |                                      |                |           |           |
| ≤19                                         | 280                                         | 15303          | 1.12      | 0.96-1.30 | 328                                  | 17246          | 1.18      | 1.04-1.34 |
| 20-24                                       | 1174                                        | 76255          | 1.03      | 0.93-1.15 | 2012                                 | 121846         | 1.08      | 1.01-1.16 |
| 25-29                                       | 623                                         | 44165          | reference |           | 2098                                 | 142482         | reference |           |
| 30-34                                       | 114                                         | 7738           | 1.10      | 0.89-1.35 | 889                                  | 59116          | 1.02      | 0.94-1.10 |
| ≥35                                         | 20                                          | 1462           | 0.89      | 0.55-1.42 | 248                                  | 16173          | 1.00      | 0.87-1.15 |
| <b>Paternal grandfather age<sup>c</sup></b> |                                             |                |           |           |                                      |                |           |           |
| ≤24                                         | 893                                         | 53448          | 1.11      | 0.99-1.24 | 1258                                 | 72627          | 1.11      | 1.03-1.19 |
| 25-29                                       | 934                                         | 65926          | reference |           | 2248                                 | 149105         | reference |           |
| 30-34                                       | 287                                         | 19432          | 1.08      | 0.92-1.26 | 1385                                 | 91618          | 1.02      | 0.95-1.09 |
| 35-39                                       | 62                                          | 4304           | 1.10      | 0.81-1.48 | 459                                  | 30769          | 0.99      | 0.89-1.10 |
| ≥40                                         | 35                                          | 1813           | 1.14      | 0.73-1.79 | 225                                  | 12744          | 1.11      | 0.97-1.28 |

OR: Odds ratios 95% CI: 95% Confidence Intervals

a: Adjust for child birth year, maternal education, maternal country of origin

- b: Adjust for maternal birth year, maternal grandmother education
- c: Adjust for paternal birth year, paternal grandmother education
- d: First-born children in the parental age cohort analysis and first-born parents in the multigeneration cohort analyses
- e: Same adjustment as model 1 in table 3

**Table 8.** Odds Ratios and 95% Confidence Intervals for Diagnosis of ASD in Grandchildren According to Grandparental Age (Years) at Delivery (Extent Multigenerational Cohort to Parents Born 1942-1990 Relinked From CRS)

| Maternal grandmother age <sup>a</sup> | ASD        |                | Model 1   |           | Model 2   |           | Model 3   |           |
|---------------------------------------|------------|----------------|-----------|-----------|-----------|-----------|-----------|-----------|
|                                       | N of cases | N of non-cases | OR        | 95% CI    | OR        | 95% CI    | OR        | 95% CI    |
| ≤19                                   | 1940       | 81537          | 1.26      | 1.20-1.33 | 1.27      | 1.19-1.34 | 1.20      | 1.14-1.26 |
| 20-24                                 | 9273       | 444091         | 1.11      | 1.08-1.15 | 1.12      | 1.08-1.15 | 1.09      | 1.06-1.13 |
| 25-29                                 | 8530       | 456385         | reference |           | reference |           | reference |           |
| 30-34                                 | 4028       | 218897         | 0.99      | 0.95-1.03 | 0.97      | 0.93-1.01 | 0.99      | 0.96-1.03 |
| 35-39                                 | 1579       | 78827          | 1.07      | 1.02-1.13 | 0.99      | 0.93-1.05 | 1.07      | 1.01-1.13 |
| ≥40                                   | 396        | 20450          | 1.03      | 0.93-1.14 | 0.89      | 0.79-1.00 | 1.02      | 0.92-1.13 |
| Maternal grandfather age <sup>a</sup> |            |                |           |           |           |           |           |           |
| ≤19                                   | 410        | 17776          | 1.16      | 1.05-1.28 | 1.01      | 0.91-1.13 | 1.12      | 1.01-1.24 |
| 20-24                                 | 5274       | 247965         | 1.07      | 1.03-1.11 | 1.00      | 0.96-1.03 | 1.05      | 1.01-1.08 |
| 25-29                                 | 9376       | 473698         | reference |           | reference |           | reference |           |
| 30-34                                 | 5870       | 320830         | 0.93      | 0.90-0.97 | 0.98      | 0.95-1.02 | 0.94      | 0.91-0.97 |
| 35-39                                 | 2859       | 148249         | 0.99      | 0.95-1.03 | 1.05      | 1.00-1.11 | 0.99      | 0.95-1.03 |
| 40-44                                 | 1269       | 60593          | 1.06      | 1.00-1.13 | 1.15      | 1.07-1.23 | 1.06      | 1.00-1.12 |
| 45-49                                 | 483        | 21807          | 1.12      | 1.02-1.23 | 1.22      | 1.11-1.36 | 1.11      | 1.01-1.22 |
| ≥50                                   | 205        | 9269           | 1.12      | 0.97-1.28 | 1.22      | 1.06-1.42 | 1.10      | 0.96-1.27 |
| Paternal grandmother age <sup>b</sup> |            |                |           |           |           |           |           |           |
| ≤19                                   | 1745       | 79200          | 1.15      | 1.09-1.21 | 1.12      | 1.05-1.19 | 1.12      | 1.06-1.18 |
| 20-24                                 | 8503       | 423714         | 1.06      | 1.02-1.09 | 1.05      | 1.02-1.09 | 1.04      | 1.01-1.08 |
| 25-29                                 | 8253       | 437424         | reference |           | reference |           | reference |           |
| 30-34                                 | 3940       | 214136         | 0.98      | 0.94-1.02 | 0.95      | 0.91-0.99 | 0.98      | 0.94-1.02 |
| 35-39                                 | 1599       | 80042          | 1.05      | 0.99-1.11 | 0.98      | 0.92-1.05 | 1.05      | 0.99-1.10 |
| ≥40                                   | 448        | 21182          | 1.10      | 1.00-1.21 | 1.00      | 0.89-1.11 | 1.09      | 0.99-1.20 |
| Paternal grandfather age <sup>b</sup> |            |                |           |           |           |           |           |           |
| ≤19                                   | 404        | 17120          | 1.22      | 1.10-1.35 | 1.14      | 1.03-1.28 | 1.19      | 1.08-1.32 |
| 20-24                                 | 4930       | 238576         | 1.08      | 1.04-1.12 | 1.04      | 1.00-1.08 | 1.06      | 1.03-1.10 |
| 25-29                                 | 8525       | 449195         | reference |           | reference |           | reference |           |
| 30-34                                 | 5809       | 309715         | 1.00      | 0.96-1.03 | 1.03      | 0.99-1.07 | 1.00      | 0.97-1.03 |
| 35-39                                 | 2879       | 148181         | 1.02      | 0.98-1.07 | 1.07      | 1.02-1.13 | 1.02      | 0.98-1.07 |
| 40-44                                 | 1276       | 62005          | 1.07      | 1.01-1.13 | 1.12      | 1.04-1.20 | 1.07      | 1.01-1.13 |
| 45-49                                 | 469        | 22046          | 1.10      | 1.00-1.21 | 1.15      | 1.03-1.27 | 1.10      | 1.00-1.21 |
| ≥50                                   | 196        | 8860           | 1.15      | 1.00-1.33 | 1.20      | 1.03-1.39 | 1.15      | 0.99-1.32 |

OR: Odds ratios 95% CI: 95% Confidence Intervals

a: Model 1: Adjust for maternal birth year

Model 2: Adjust for maternal birth year and spouse age

Model 3: Adjust for maternal birth year and maternal age

b: Model 1: Adjust for paternal birth year

Model 2: Adjust for paternal age and spouse age

Model 3: Adjust for paternal birth year and paternal age

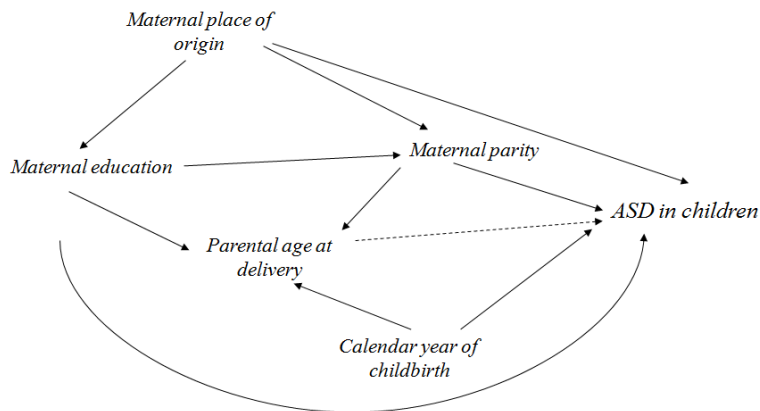

eFigure 1. The Directed Acyclic Graph (DAG) for the Main Variables Included in the Analyses for Parental Age and ASD Risk in Children

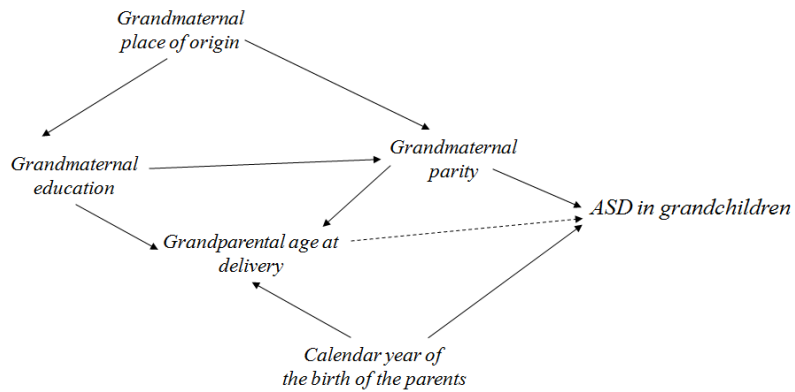

eFigure 2. The Directed Acyclic Graph (DAG) for the Main Variables Included in the Analyses for Grandparental Age and ASD Risk in Grandchildren

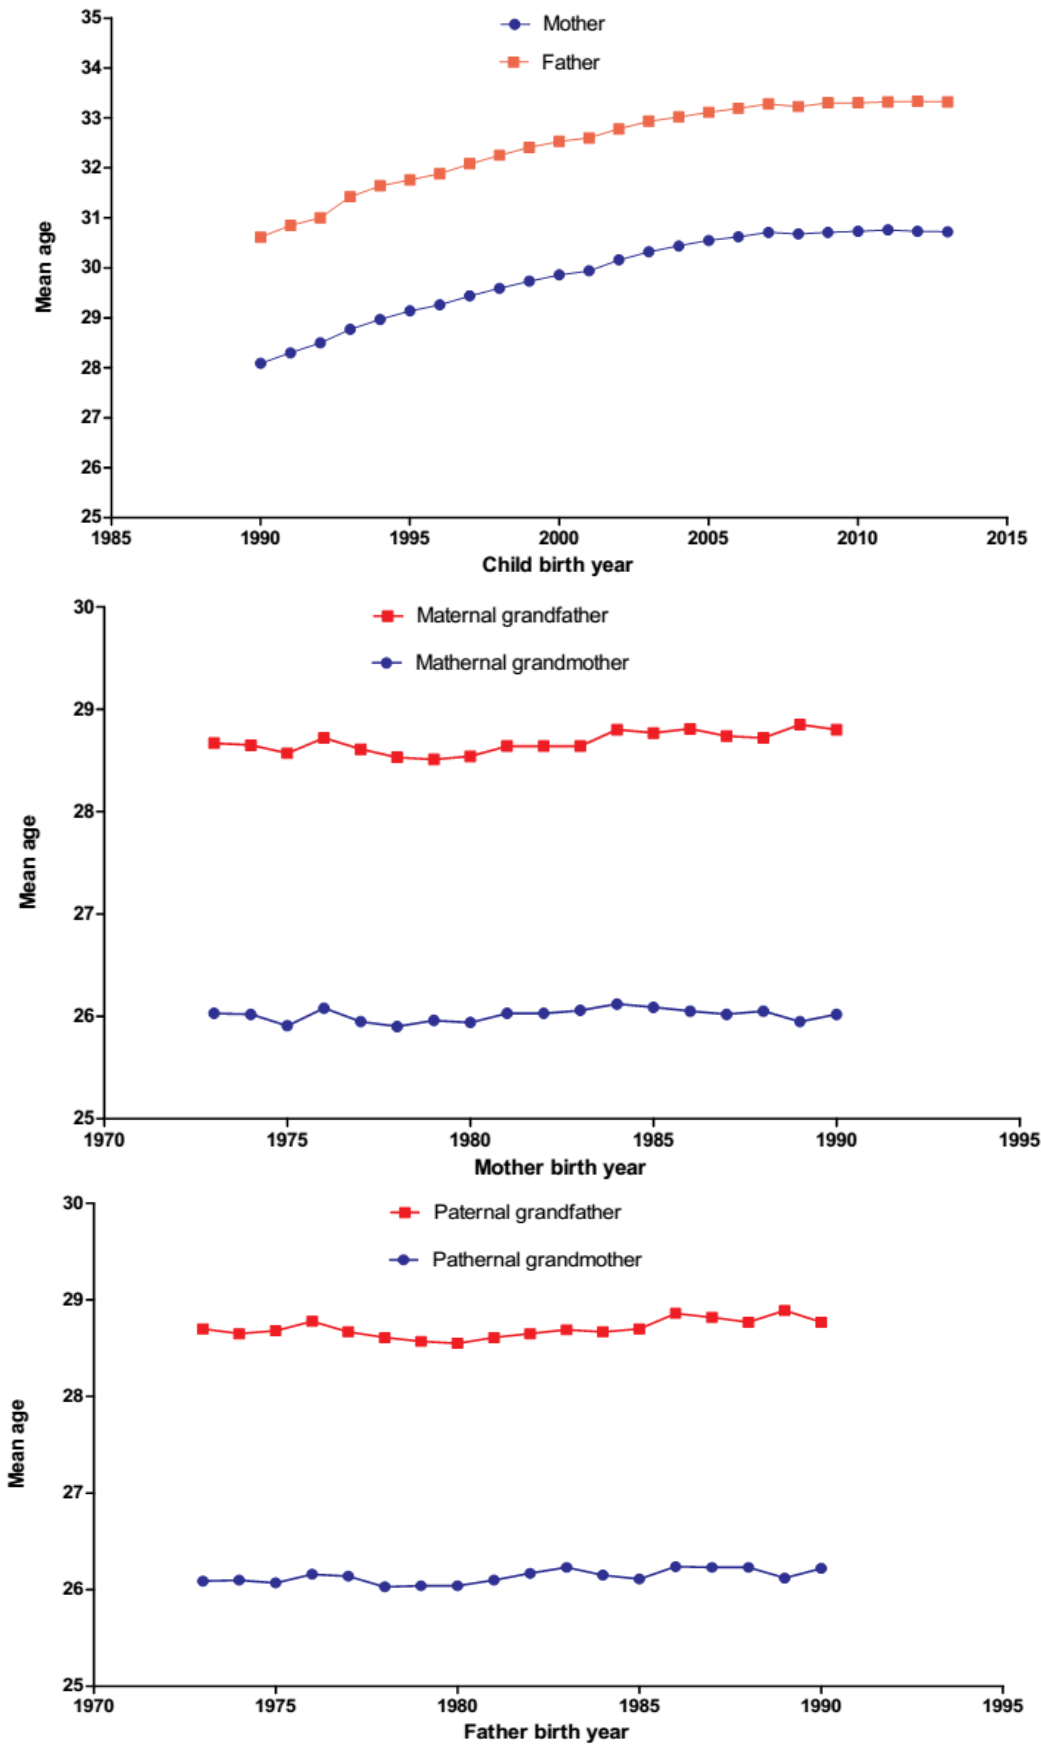

Figure 3. Mean Age at Birth of the Parents and Grandparents in Parental Age Cohort and Multigenerational Cohort During the Study Period
